# Supplementary material for: One bioprobe: a fluorescent and AIE-active macromolecule; two targets: nucleolus and mitochondria with long term tracking
Source: Royal Society of Chemistry journal article supplement (doi:10.1039/c6tb02844f), 2016-11-28
Supplement: c6tb02844f1.pdf [file c6tb02844f1.pdf]

## **Supplementary Information**

### **One Bioprobe: A Fluorescent and AIE-active Macromolecule; Two Targets: Nucleolus and Mitochondria with Long Term Tracking**

*Hengchang Ma,\* Zengming Yang, Haiying Cao, Lei Lei, Lu Chang, Yucheng Ma,  
Manyi Yang, Xiaoqiang Yao, Shaobo Sun, and Ziqiang Lei\**

## Table of Contents

|                                                                         |   |
|-------------------------------------------------------------------------|---|
| Synthesis and characterization of the TPPA-DBO.....                     | 2 |
| <b>Scheme S1.</b> Synthesis of the TPPA-DBO.                            |   |
| <b>Figure S1.</b> $^1\text{H}$ NMR spectra of TPPA and TPPA-DBO.....    | 3 |
| <b>Figure S2.</b> FT-IR spectra of TPPA and TPPA-DBO.....               | 3 |
| <b>Figure S3.</b> Spectroscopic studies and images of TPPA-DBO.....     | 4 |
| <b>Figure S4.</b> AIE study of TPPA-DBO.....                            | 5 |
| <b>Figure S5.</b> $^{13}\text{C}$ NMR spectra of TPPA and TPPA-DBO..... | 6 |

### Synthesis and Characterization of the TPPA-DBO

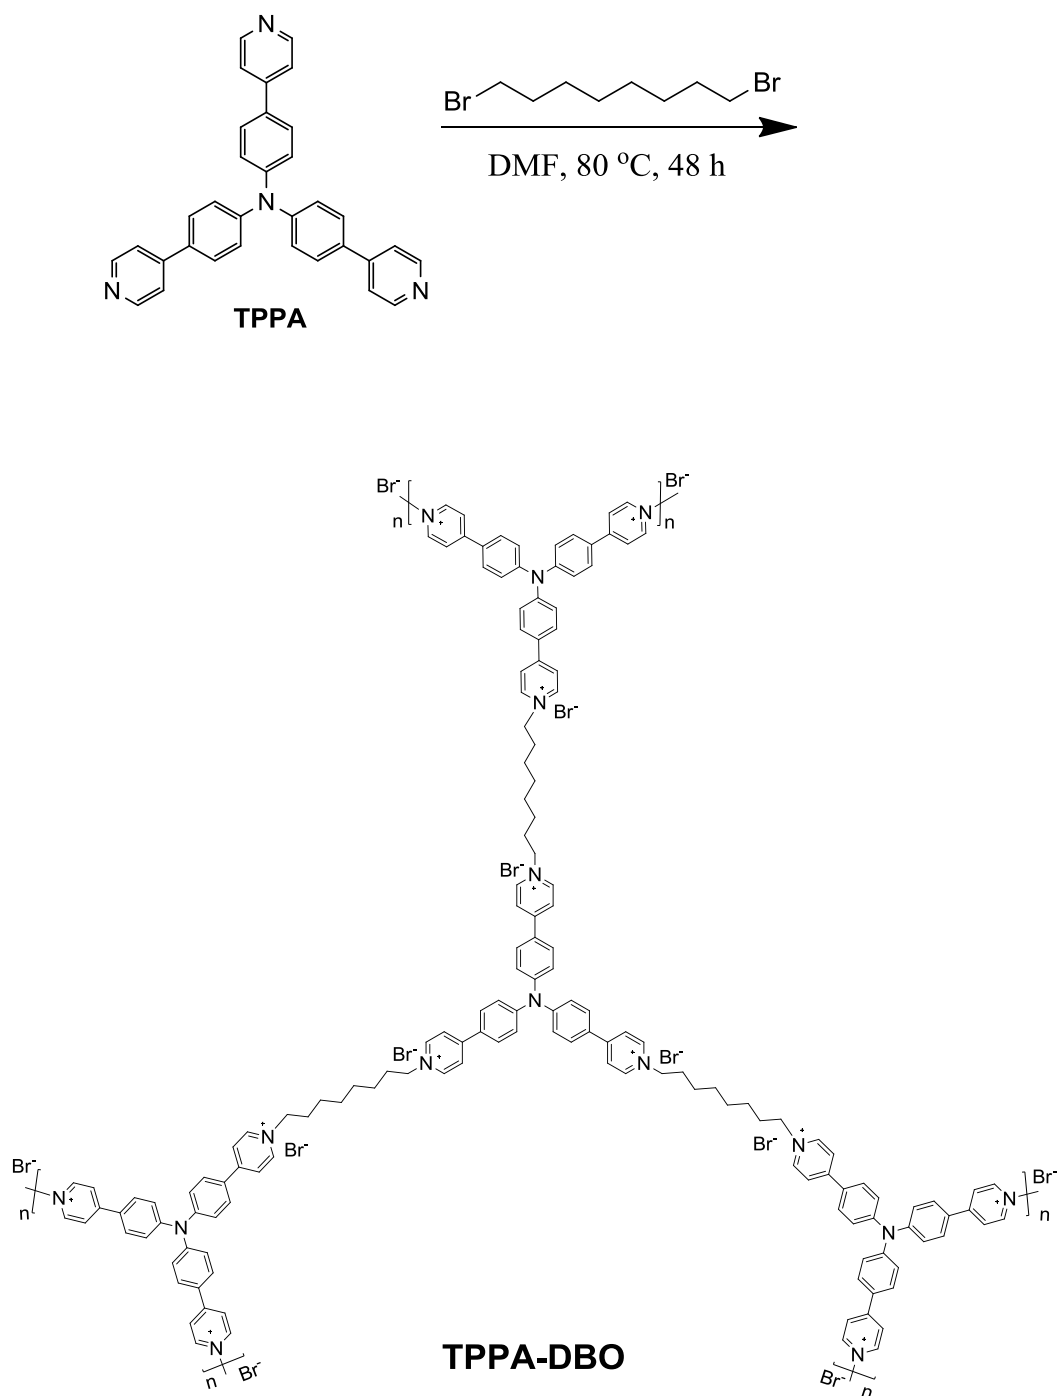

Scheme S1. The synthesis of TPPA-DBO probe.

*TPPA were obtained by the documented method. (Macromolecules, 2015, 48 (13), pp 4541–4554)*

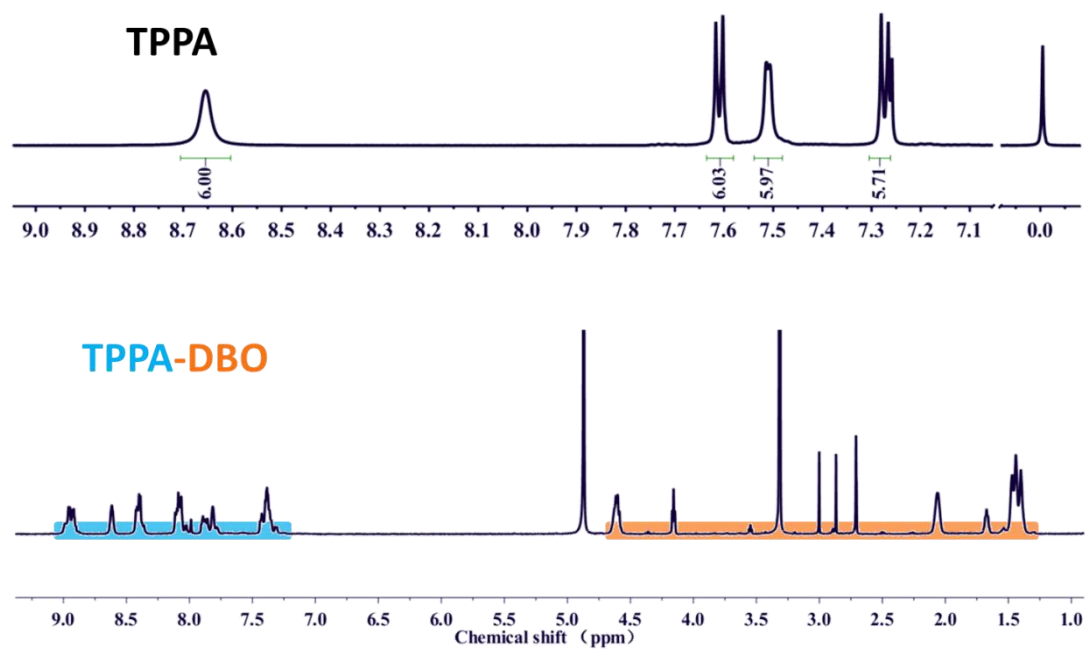

Figure S1  $^1\text{H}$  NMR spectra of TPPA and TPPA-DBO in  $\text{CDCl}_3$  and  $\text{D}_2\text{O}$ .

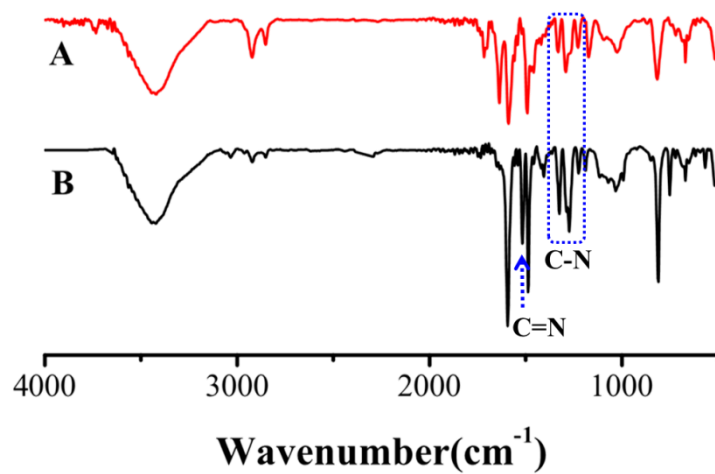

Figure S2 FT-IR spectra of (A) TPPA and (B) TPPA-DBO.

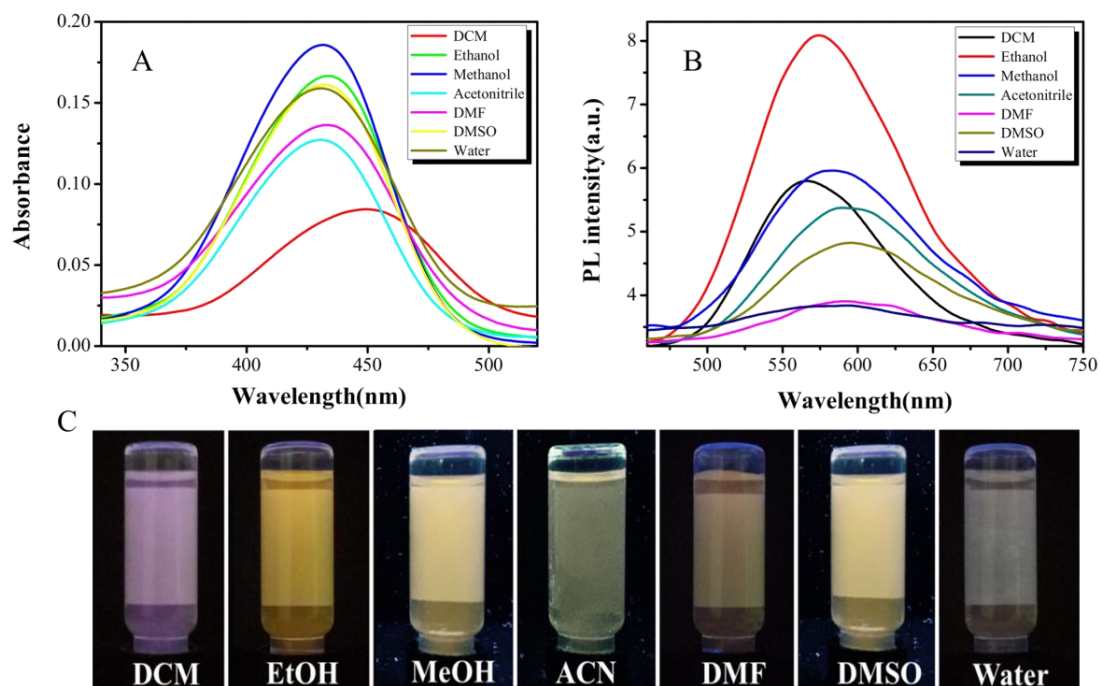

Figure S3 (A) Absorbance spectra of TPPA-DBO in different solvents. (B) Emission spectra of TPPA-DBO in different solvents. (C) Photographs of TPPA-DBO in different solvents. (solution concentration:  $5 \times 10^{-3}$  g/L, excitation wavelength = 425 nm).

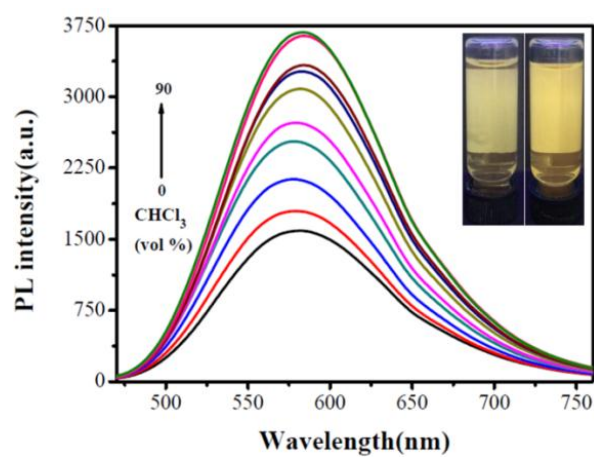

Figure S4 The normalized emission spectra of TPPA-DBO in EtOH and in the mixture of EtOH& $\text{CHCl}_3$ . (solution concentration:  $5 \times 10^{-3}$  g/L, excitation wavelength = 425 nm)

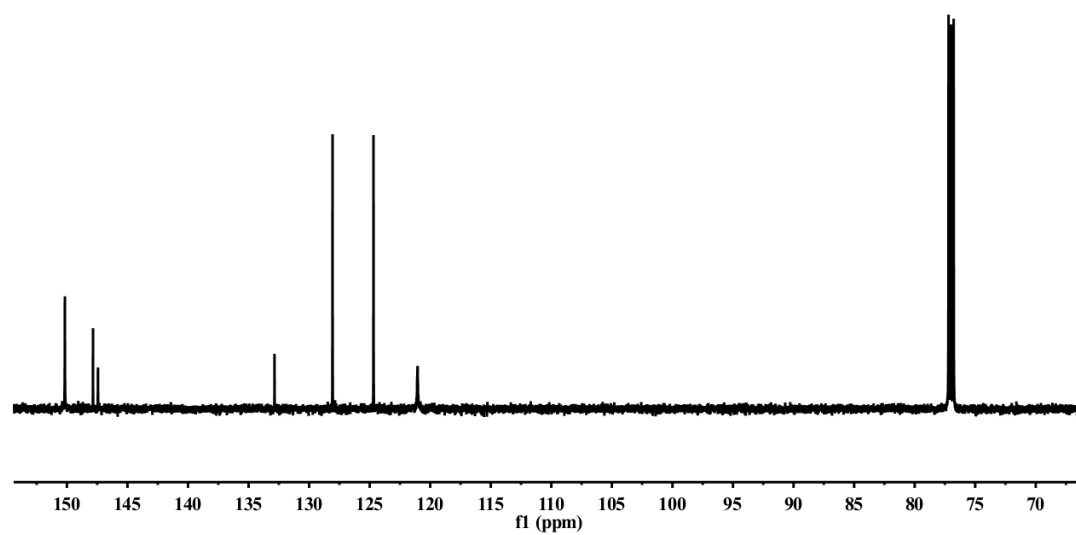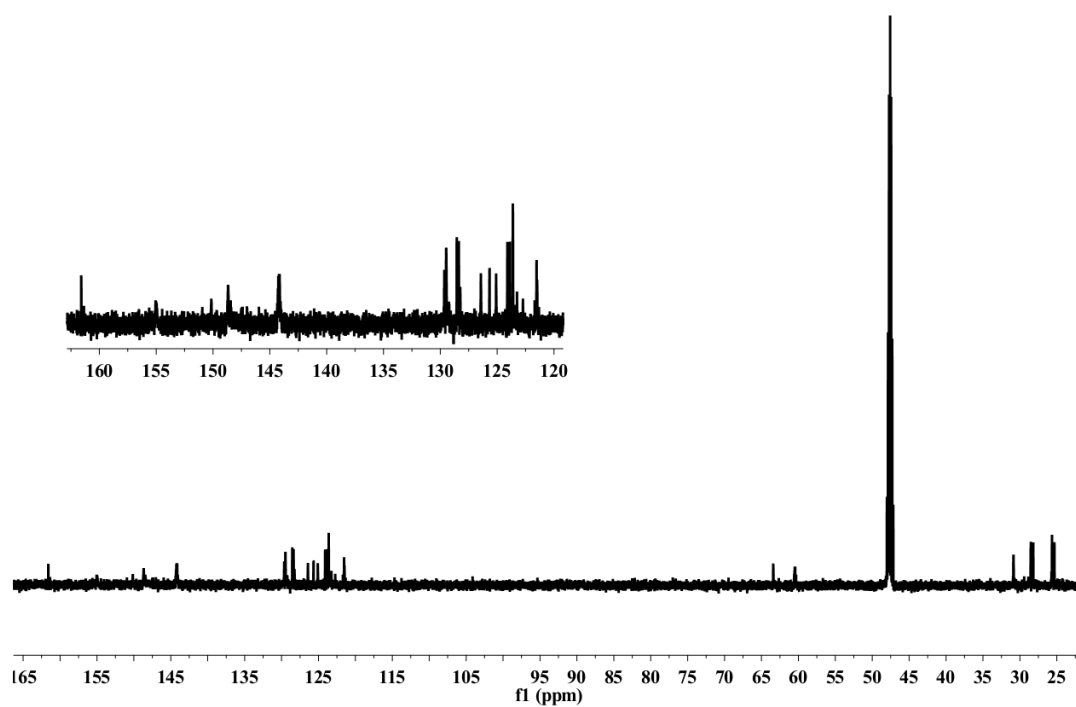

Figure. S5  $^{13}\text{C}$  NMR spectra of TPPA (Top) and TPPA-DBO (Bottom) in  $\text{CDCl}_3$  and  $\text{D}_2\text{O}$ .
